# Supplementary material
Source: PubMed Central journal article supplement (PMC3231841)
Supplement: 11-8153_z7g999112165sf01.pdf [file 11-8153_z7g999112165sf01.pdf]

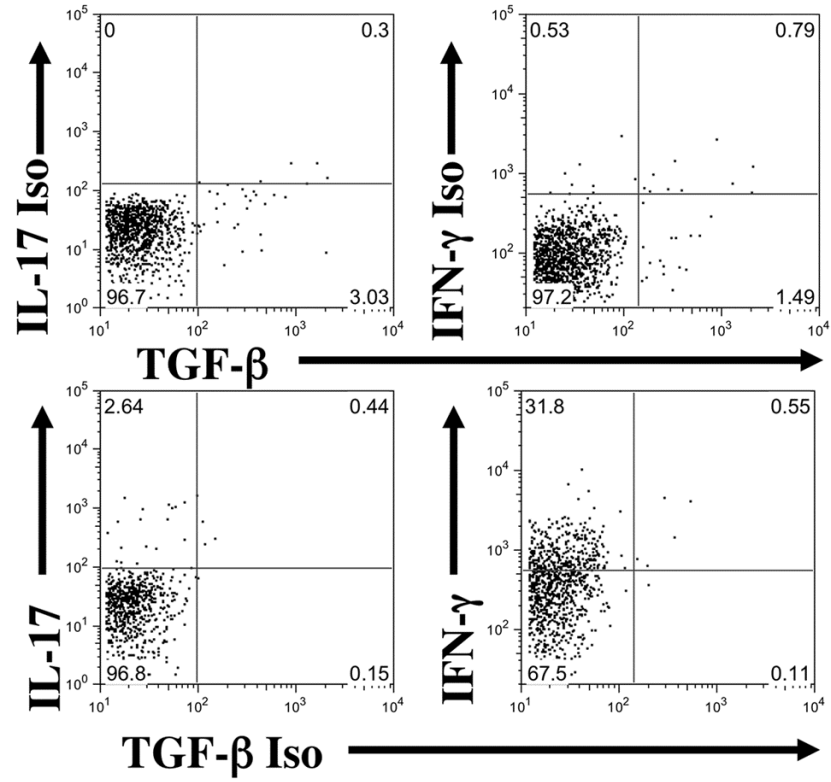

**Supplementary Figure 1. Isotype controls for intracellular staining for IFN- $\gamma$ , IL-17, TGF- $\beta$ , in gated CD25<sup>+</sup> CD4<sup>+</sup> T cells from the spleens of EAU-recovered wild type mice. The spleen cells from EAU-recovered wild type mice were collected, and restimulated with IRBpp 1-20 in culture for 24 hours as described in the methods. The cells were collected and stained as described in the methods for flow cytometry using isotype antibodies.**
